# Supplementary material
Source: PubMed Central journal article supplement (PMC6783280)
Supplement: NIHMS1530200-supplement-1.pdf [file NIHMS1530200-supplement-1.pdf]

| RNA Species | Numbers of Detected | Differently Expressed<br>(raw $p < 0.05$ ) |
|-------------|---------------------|--------------------------------------------|
| tRFs        | 92                  | 0                                          |
| piRNAs      | 95                  | 0                                          |
| tRNAs       | 180                 | 0                                          |
| miRNAs      | 97                  | 3                                          |
